# Supplementary material for: FABP7 Facilitates Uptake of Docosahexaenoic Acid in Glioblastoma Neural Stem-like Cells
Source: MDPI journal article supplement (doi:10.3390/nu13082664), 2021-07-30
Supplement: s1 [file s1]

## **FABP7 Facilitates Uptake of Docosahexaenoic Acid in Glioblastoma Neural Stem-like Cells**

Won-Shik Choi<sup>1\*</sup>, Xia Xu<sup>1\*</sup>, Susan Goruk<sup>2</sup>, Yixiong Wang<sup>1</sup>, Samir Patel<sup>1</sup>, Michael Chow<sup>3</sup>, Catherine J. Field<sup>2</sup> and Roseline Godbout<sup>1#</sup>

<sup>1</sup>Department of Oncology, Cross Cancer Institute, University of Alberta, 11560 University Avenue, Edmonton, AB T6G 1Z2, Canada; <sup>2</sup>Department of Agricultural, Food and Nutritional Science, University of Alberta, Edmonton, AB T6G 2E1, Canada; and <sup>3</sup>Department of Surgery, University of Alberta, Edmonton, AB T6G 2B7, Canada

\* These authors made equal contributions to the manuscript

# Communicating author

### **Table of contents**

Figure S1: Effects of DHA treatment on lipid droplet formation in U251 and ED501N cells with or without FABP7 depletion.

Table S1: Fatty acid composition of total lipids extracted from A4-004N and A4-004Adh cells.

Table S2: Fatty acid composition of total lipids extracted from A4-004N and A4-004Adh cells cultured in media supplemented with BSA (control), 30  $\mu$ M AA or 30  $\mu$ M DHA.

Table S3: Fatty acid composition of total lipids and total phospholipids extracted from A4-004N and A4-004Adh cells cultured under normal culture conditions and in media supplemented with 30  $\mu$ M BSA.

Table S4: Fatty acid composition of total phospholipids from A4-004N and A4-004Adh cells.

Table S5: Fatty acid composition of total phospholipids from A4-004N and A4-004Adh cells cultured in media supplemented with BSA (control), 30  $\mu$ M AA or 30  $\mu$ M DHA.

## Figure S1

### U251

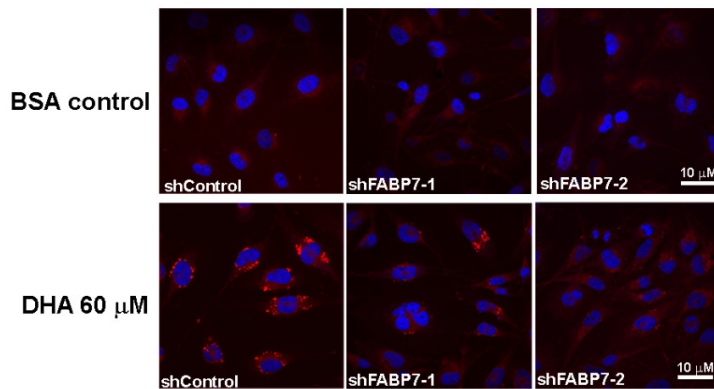

### ED501N

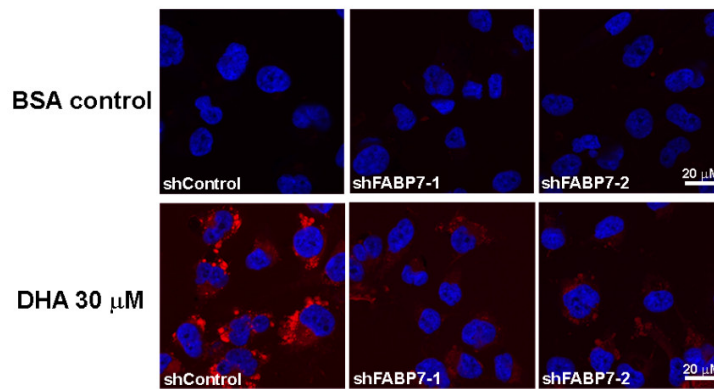

**Supplementary Figure S1. Effect of DHA treatment and FABP7-knockdown on lipid droplet formation in U251 and ED501N cells.** Stable knockdown of FABP7 in U251 GBM adherent cells and ED501 GBM neural stem-like cells was confirmed as previously described [49]. Cells were cultured in medium supplemented with BSA (control), 60  $\mu$ M DHA (U251 cells), or 30  $\mu$ M DHA (ED501N cells). After 24 hours, cells were fixed and stained with Nile Red. Representative confocal images are shown. DAPI was used to stain the nucleus.

**Table S1. Fatty acid composition of total lipids extracted from A4-004N and A4-004Adh cells.**

| Fatty Acids        | A4-004N (N = 3)                            |       | A4-004Adh (N = 3) |       | <i>p</i> -value   |
|--------------------|--------------------------------------------|-------|-------------------|-------|-------------------|
|                    | % Abundance of fatty acids in total lipids |       |                   |       |                   |
|                    | Mean                                       | ±SD   | Mean              | ±SD   |                   |
| C14:0              | 2.14                                       | ±0.10 | 1.71              | ±0.07 | <i>p</i> = 0.53   |
| C15:0              | 0.13                                       | ±0.02 | 0.52              | ±0.03 | <i>p</i> = 0.0001 |
| C16:0 (PA)         | 25.75                                      | ±0.59 | 29.22             | ±1.08 | <i>p</i> = 0.008  |
| C17:0              | 0.89                                       | ±0.06 | 0.67              | ±0.06 | <i>p</i> = 0.01   |
| C18:0 (SA)         | 15.74                                      | ±0.11 | 17.87             | ±1.15 | <i>p</i> = 0.03   |
| C20:0              | 0.21                                       | ±0.04 | 0.39              | ±0.07 | <i>p</i> = 0.01   |
| C24:0              | 4.37                                       | ±0.40 | 0.63              | ±0.13 | <i>p</i> = 0.0001 |
| Total SFA          | 49.24                                      | ±0.27 | 52.39             | ±1.48 | <i>p</i> = 0.02   |
| C16:1ω-9           | 7.88                                       | ±0.16 | 6.14              | ±0.50 | <i>p</i> = 0.004  |
| C18:1ω-9 (OA)      | 27.45                                      | ±0.48 | 21.94             | ±0.66 | <i>p</i> = 0.0003 |
| C18:1ω-7           | 5.65                                       | ±0.09 | 7.37              | ±0.25 | <i>p</i> = 0.0004 |
| C24:1ω-9           | 1.42                                       | ±0.51 | 1.15              | ±0.17 | <i>p</i> = 0.44   |
| Total MUFA         | 42.40                                      | ±0.09 | 36.59             | ±1.26 | <i>p</i> = 0.001  |
| C18:2ω-6 (LA)      | 0.18                                       | ±0.03 | 0.72              | ±0.09 | <i>p</i> = 0.0005 |
| C20:2ω-6           | 3.25                                       | ±0.24 | 0.95              | ±0.14 | <i>p</i> = 0.0001 |
| C20:3ω-6 (DGLA)    | 0.74                                       | ±0.10 | 1.67              | ±0.07 | <i>p</i> = 0.0002 |
| C20:4ω-6 (AA)      | 1.01                                       | ±0.14 | 3.01              | ±0.36 | <i>p</i> = 0.0008 |
| C22:4ω-6 (ADA)     | 0.60                                       | ±0.01 | 1.24              | ±0.13 | <i>p</i> = 0.001  |
| C22:5ω-6 (ω-6 DPA) | 0.10                                       | ±0.03 | 0.22              | ±0.03 | <i>p</i> = 0.006  |
| Total ω-6          | 5.88                                       | ±0.29 | 7.82              | ±0.47 | <i>p</i> = 0.004  |
| C18:3ω-3 (ALA)     | 1.79                                       | ±0.09 | 0.95              | ±0.08 | <i>p</i> = 0.0003 |
| C20:4ω-3           | 0.06                                       | ±0.02 | 0.16              | ±0.01 | <i>p</i> = 0.001  |
| C20:5ω-3 (EPA)     | 0.09                                       | ±0.03 | 0.09              | ±0.02 | <i>p</i> = 0.88   |
| C22:5ω-3 (ω-3 DPA) | 0.47                                       | ±0.04 | 0.96              | ±0.11 | <i>p</i> = 0.002  |
| C22:6ω-3 (DHA)     | 0.09                                       | ±0.01 | 1.04              | ±0.13 | <i>p</i> = 0.0002 |
| Total ω-3          | 2.49                                       | ±0.05 | 3.20              | ±0.19 | <i>p</i> = 0.003  |
| Total PUFA         | 8.36                                       | ±0.34 | 11.02             | ±0.65 | <i>p</i> = 0.003  |
| C22:6ω-3:C20:4ω-6  | 0.14                                       | ±0.02 | 0.84              | ±0.05 | <i>p</i> < 0.0001 |
| ω-3 PUFA:ω-6 PUFA  | 0.42                                       | ±0.01 | 0.41              | ±0.00 | <i>p</i> = 0.13   |

Data are presented as mean ± standard deviation (SD). *p*-value of <0.05 was considered statistically significant.

**Table S2. Fatty acid composition of total lipids extracted from A4-004N and A4-004Adh cells cultured in media supplemented with BSA (control), 30  $\mu$ M AA or 30  $\mu$ M DHA.**

| Fatty Acids        | A4-004N                                    |       |                  |       |                   |       |              | A4-004Adh           |       |                  |       |                   |       |              |
|--------------------|--------------------------------------------|-------|------------------|-------|-------------------|-------|--------------|---------------------|-------|------------------|-------|-------------------|-------|--------------|
|                    | BSA Control (N = 3)                        |       | AA 30 μM (N = 3) |       | DHA 30 μM (N = 3) |       |              | BSA Control (N = 3) |       | AA 30 μM (N = 3) |       | DHA 30 μM (N = 3) |       |              |
|                    | % Abundance of fatty acids in total lipids |       |                  |       |                   |       |              |                     |       |                  |       |                   |       |              |
|                    | Average                                    | ±SD   | Average          | ±SD   | Average           | ±SD   | ANOVA        | Average             | ±SD   | Average          | ±SD   | Average           | ±SD   | ANOVA        |
| C14:0              | 2.21a                                      | ±0.08 | 2.65b            | ±0.05 | 2.18a             | ±0.03 | $p = 0.0001$ | 1.89a               | ±0.02 | 1.73ab           | ±0.07 | 1.68b             | ±0.11 | $p = 0.036$  |
| C15:0              | 0.16                                       | ±0.02 | 0.14             | ±0.02 | 0.12              | ±0.03 | $p = 0.14$   | 0.55a               | ±0.01 | 0.48b            | ±0.02 | 0.50b             | ±0.02 | $p = 0.0066$ |
| C16:0 (PA)         | 25.54a                                     | ±0.24 | 25.53a           | ±0.40 | 24.23b            | ±0.42 | $p = 0.0065$ | 29.38a              | ±0.46 | 30.52b           | ±0.36 | 29.61ab           | ±0.41 | $p = 0.033$  |
| C17:0              | 0.81a                                      | ±0.06 | 0.83a            | ±0.04 | 0.55b             | ±0.07 | $p = 0.0012$ | 0.60                | ±0.12 | 0.64             | ±0.04 | 0.70              | ±0.04 | $p = 0.38$   |
| C18:0 (SA)         | 16.39a                                     | ±0.46 | 17.74b           | ±0.48 | 17.47ab           | ±0.54 | $p = 0.034$  | 17.30a              | ±0.40 | 18.45b           | ±0.07 | 17.91ab           | ±0.29 | $p = 0.027$  |
| C20:0              | 0.29                                       | ±0.05 | 0.24             | ±0.03 | 0.24              | ±0.03 | $p = 0.17$   | 0.36a               | ±0.03 | 0.29b            | ±0.02 | 0.29b             | ±0.01 | $p = 0.014$  |
| C24:0              | 3.91a                                      | ±0.44 | 2.52b            | ±0.29 | 2.72b             | ±0.06 | $p = 0.0082$ | 0.77a               | ±0.03 | 0.34b            | ±0.06 | 0.39b             | ±0.06 | $p = 0.0001$ |
| Total SFA          | 49.30                                      | ±0.71 | 49.65            | ±0.45 | 47.79             | ±1.27 | $p = 0.10$   | 50.85               | ±0.98 | 52.22            | ±0.22 | 51.08             | ±0.73 | $p = 0.23$   |
| C16:1ω-9           | 7.43a                                      | ±0.14 | 5.75b            | ±0.05 | 5.46b             | ±0.49 | $p = 0.0004$ | 5.76a               | ±0.25 | 3.74b            | ±0.19 | 4.10b             | ±0.23 | $p < 0.0001$ |
| C18:1ω-9 (OA)      | 27.27a                                     | ±0.37 | 20.67b           | ±0.24 | 23.39c            | ±0.52 | $p < 0.0001$ | 22.31a              | ±0.47 | 15.64b           | ±0.54 | 18.70c            | ±0.56 | $p < 0.0001$ |
| C18:1ω-7           | 5.85a                                      | ±0.03 | 4.33b            | ±0.13 | 3.98b             | ±0.41 | $p = 0.0002$ | 7.25a               | ±0.16 | 5.81b            | ±0.13 | 5.76b             | ±0.19 | $p < 0.0001$ |
| C24:1ω-9           | 1.25                                       | ±0.16 | 0.98             | ±0.10 | 0.95              | ±0.13 | $p = 0.058$  | 1.47a               | ±0.05 | 0.78b            | ±0.22 | 1.05b             | ±0.02 | $p = 0.0018$ |
| Total MUFA         | 41.80a                                     | ±0.62 | 31.73b           | ±0.46 | 34.22c            | ±0.73 | $p < 0.0001$ | 36.79a              | ±0.90 | 25.97b           | ±0.98 | 29.60c            | ±0.95 | $p < 0.0001$ |
| C18:2ω-6 (LA)      | 0.34a                                      | ±0.01 | 0.16b            | ±0.03 | 0.79c             | ±0.20 | $p < 0.0001$ | 1.20a               | ±0.14 | 0.68b            | ±0.07 | 1.81c             | ±0.08 | $p < 0.0001$ |
| C20:2ω-6           | 2.72a                                      | ±0.22 | 1.75b            | ±0.20 | 1.83b             | ±0.28 | $p = 0.0042$ | 0.82a               | ±0.15 | 0.35b            | ±0.05 | 0.39b             | ±0.05 | $p = 0.0017$ |
| C20:3ω-6 (DGLA)    | 0.94                                       | ±0.09 | 1.06             | ±0.07 | 1.07              | ±0.11 | $p = 0.22$   | 2.20a               | ±0.11 | 1.54b            | ±0.05 | 2.05a             | ±0.09 | $p = 0.0002$ |
| C20:4ω-6 (AA)      | 1.47a                                      | ±0.04 | 6.31b            | ±0.19 | 1.18a             | ±0.09 | $p < 0.0001$ | 3.43a               | ±0.09 | 7.87b            | ±0.75 | 3.01a             | ±0.16 | $p < 0.0001$ |
| C22:4ω-6 (ADA)     | 0.87a                                      | ±0.06 | 6.77b            | ±0.12 | 0.58c             | ±0.07 | $p < 0.0001$ | 1.40a               | ±0.03 | 6.81b            | ±0.79 | 1.12a             | ±0.08 | $p < 0.0001$ |
| C22:5ω-6 (ω-6 DPA) | 0.10a                                      | ±0.01 | 0.76b            | ±0.07 | 0.11a             | ±0.03 | $p < 0.0001$ | 0.19a               | ±0.01 | 1.04b            | ±0.09 | 0.24a             | ±0.04 | $p < 0.0001$ |
| Total ω-6          | 6.45a                                      | ±0.29 | 16.80b           | ±0.07 | 5.66c             | ±0.09 | $p < 0.0001$ | 9.24a               | ±0.35 | 18.30b           | ±1.55 | 8.63a             | ±0.20 | $p < 0.0001$ |
| C18:3ω-3 (ALA)     | 1.68a                                      | ±0.04 | 1.19b            | ±0.06 | 1.13b             | ±0.12 | $p = 0.0003$ | 0.91a               | ±0.04 | 0.60b            | ±0.08 | 0.63b             | ±0.03 | $p = 0.0006$ |
| C20:4ω-3           | 0.08                                       | ±0.02 | 0.05             | ±0.01 | 0.04              | ±0.01 | $p = 0.12$   | 0.19a               | ±0.02 | 0.11b            | ±0.03 | 0.10b             | ±0.02 | $p = 0.014$  |
| C20:5ω-3 (EPA)     | 0.07a                                      | ±0.01 | 0.07a            | ±0.01 | 0.41b             | ±0.08 | $p = 0.0001$ | 0.09a               | ±0.01 | 0.07a            | ±0.01 | 0.45b             | ±0.03 | $p < 0.0001$ |
| C22:5ω-3 (ω-3 DPA) | 0.52a                                      | ±0.06 | 0.42a            | ±0.03 | 1.21b             | ±0.18 | $p = 0.0003$ | 0.92a               | ±0.05 | 0.86a            | ±0.10 | 1.42b             | ±0.09 | $p = 0.0003$ |
| C22:6ω-3 (DHA)     | 0.10a                                      | ±0.02 | 0.07a            | ±0.01 | 11.20b            | ±2.76 | $p = 0.0002$ | 1.01a               | ±0.09 | 0.90a            | ±0.11 | 8.09b             | ±0.29 | $p < 0.0001$ |
| Total ω-3          | 2.45a                                      | ±0.06 | 1.81a            | ±0.06 | 13.99b            | ±2.91 | $p = 0.0002$ | 3.12a               | ±0.07 | 2.54a            | ±0.15 | 10.69b            | ±0.41 | $p < 0.0001$ |
| Total PUFA         | 8.90a                                      | ±0.35 | 18.62b           | ±0.01 | 18.00b            | ±0.54 | $p < 0.0001$ | 12.36a              | ±0.37 | 20.84b           | ±1.69 | 19.31b            | ±0.58 | $p = 0.0001$ |
| C22:6ω-3:C20:4ω-6  | 0.07a                                      | ±0.01 | 0.01a            | ±0.00 | 9.65b             | ±3.13 | $p = 0.0009$ | 0.30a               | ±0.02 | 0.11b            | ±0.01 | 2.69c             | ±0.12 | $p < 0.0001$ |
| ω-3 PUFA:ω-6 PUFA  | 0.38a                                      | ±0.01 | 0.11b            | ±0.00 | 2.18c             | ±0.14 | $p < 0.0001$ | 0.34a               | ±0.01 | 0.14b            | ±0.00 | 1.24c             | ±0.03 | $p < 0.0001$ |

Different letters indicate that groups are significantly different. Differences were assessed for significance using one-way analysis of variance followed by post-hoc Tukey's test.  $p$ -value of  $<0.05$  was considered statistically significant.

**Table S3. Fatty acid composition of total lipids and total phospholipids from A4-004N and A4-004Adh cells cultured under normal culture conditions (not treated (NT); from Tables S1 and S4) and in media supplemented with 30  $\mu$ M BSA (from Tables S2 and S5).**

| Fatty Acids                          | A4-004N total lipid |            |         |            |        | A4-004Adh total lipid |            |         |            |        | A4-004N total phospholipid |            |         |            |        | A4-004Adh total phospholipid |            |         |            |        |
|--------------------------------------|---------------------|------------|---------|------------|--------|-----------------------|------------|---------|------------|--------|----------------------------|------------|---------|------------|--------|------------------------------|------------|---------|------------|--------|
|                                      | NT                  |            | BSA     |            | t-test | NT                    |            | BSA     |            | t-test | NT                         |            | BSA     |            | t-test | NT                           |            | BSA     |            | t-test |
|                                      | Mean                | $\pm$ SD   | Average | $\pm$ SD   |        | Mean                  | $\pm$ SD   | Average | $\pm$ SD   |        | Mean                       | $\pm$ SD   | Average | $\pm$ SD   |        | Mean                         | $\pm$ SD   | Average | $\pm$ SD   |        |
| C14:0                                | 2.14                | $\pm$ 0.10 | 2.21    | $\pm$ 0.08 | 0.39   | 1.71                  | $\pm$ 0.07 | 1.89    | $\pm$ 0.02 | 0.43   | 1.92                       | $\pm$ 0.15 | 1.56    | $\pm$ 0.56 | 0.34   | 1.47                         | $\pm$ 0.10 | 1.48    | $\pm$ 0.17 | 0.92   |
| C15:0                                | 0.13                | $\pm$ 0.02 | 0.16    | $\pm$ 0.02 | 0.21   | 0.52                  | $\pm$ 0.03 | 0.55    | $\pm$ 0.01 | 0.35   | 0.21                       | $\pm$ 0.14 | 0.20    | $\pm$ 0.09 | 0.93   | 0.47                         | $\pm$ 0.04 | 0.46    | $\pm$ 0.07 | 0.88   |
| C16:0 (PA)                           | 25.75               | $\pm$ 0.59 | 25.54   | $\pm$ 0.24 | 0.59   | 29.22                 | $\pm$ 1.08 | 29.38   | $\pm$ 0.46 | 0.83   | 24.59                      | $\pm$ 0.04 | 24.50   | $\pm$ 0.54 | 0.84   | 26.23                        | $\pm$ 0.88 | 26.18   | $\pm$ 0.97 | 0.95   |
| C17:0                                | 0.89                | $\pm$ 0.06 | 0.81    | $\pm$ 0.06 | 0.17   | 0.67                  | $\pm$ 0.06 | 0.60    | $\pm$ 0.12 | 0.43   | 0.72                       | $\pm$ 0.11 | 0.70    | $\pm$ 0.19 | 0.89   | 0.58                         | $\pm$ 0.06 | 0.57    | $\pm$ 0.08 | 0.91   |
| C18:0 (SA)                           | 15.74               | $\pm$ 0.11 | 16.39   | $\pm$ 0.46 | 0.08   | 17.87                 | $\pm$ 1.15 | 17.30   | $\pm$ 0.40 | 0.47   | 14.86                      | $\pm$ 0.58 | 14.53   | $\pm$ 0.54 | 0.62   | 16.40                        | $\pm$ 0.55 | 16.24   | $\pm$ 0.85 | 0.81   |
| C20:0                                | 0.21                | $\pm$ 0.04 | 0.29    | $\pm$ 0.05 | 0.08   | 0.39                  | $\pm$ 0.07 | 0.36    | $\pm$ 0.03 | 0.55   | 0.50                       | $\pm$ 0.05 | 0.56    | $\pm$ 0.14 | 0.55   | 0.43                         | $\pm$ 0.11 | 0.55    | $\pm$ 0.11 | 0.32   |
| C24:0                                | 4.37                | $\pm$ 0.40 | 3.91    | $\pm$ 0.44 | 0.26   | 0.63                  | $\pm$ 0.13 | 0.77    | $\pm$ 0.03 | 0.14   | 4.43                       | $\pm$ 0.15 | 3.92    | $\pm$ 0.57 | 0.35   | 0.82                         | $\pm$ 0.22 | 0.78    | $\pm$ 0.15 | 0.85   |
| Total SFA                            | 49.24               | $\pm$ 0.27 | 49.30   | $\pm$ 0.71 | 0.89   | 52.39                 | $\pm$ 1.48 | 50.85   | $\pm$ 0.98 | 0.21   | 47.23                      | $\pm$ 0.13 | 46.17   | $\pm$ 0.21 | 0.03   | 47.20                        | $\pm$ 0.10 | 46.27   | $\pm$ 2.10 | 0.59   |
| C16:1 $\omega$ -9                    | 7.88                | $\pm$ 0.16 | 7.43    | $\pm$ 0.14 | 0.02   | 6.14                  | $\pm$ 0.50 | 5.76    | $\pm$ 0.25 | 0.31   | 8.22                       | $\pm$ 0.15 | 8.00    | $\pm$ 0.06 | 0.17   | 7.46                         | $\pm$ 0.39 | 7.33    | $\pm$ 0.38 | 0.73   |
| C18:1 $\omega$ -9 (OA)               | 27.45               | $\pm$ 0.48 | 27.27   | $\pm$ 0.37 | 0.64   | 21.94                 | $\pm$ 0.66 | 22.31   | $\pm$ 0.47 | 0.48   | 27.29                      | $\pm$ 0.22 | 28.14   | $\pm$ 0.36 | 0.10   | 23.66                        | $\pm$ 0.41 | 23.56   | $\pm$ 0.46 | 0.82   |
| C18:1 $\omega$ -7                    | 5.65                | $\pm$ 0.09 | 5.85    | $\pm$ 0.03 | 0.02   | 7.37                  | $\pm$ 0.25 | 7.25    | $\pm$ 0.16 | 0.53   | 6.18                       | $\pm$ 0.10 | 6.26    | $\pm$ 0.20 | 0.59   | 6.96                         | $\pm$ 0.19 | 6.93    | $\pm$ 0.40 | 0.92   |
| C24:1 $\omega$ -9                    | 1.42                | $\pm$ 0.51 | 1.25    | $\pm$ 0.16 | 0.62   | 1.15                  | $\pm$ 0.17 | 1.47    | $\pm$ 0.05 | 0.04   | 1.35                       | $\pm$ 0.29 | 1.40    | $\pm$ 0.04 | 0.78   | 1.11                         | $\pm$ 0.33 | 1.23    | $\pm$ 0.17 | 0.69   |
| Total MUFA                           | 42.40               | $\pm$ 0.09 | 41.80   | $\pm$ 0.62 | 0.18   | 36.59                 | $\pm$ 1.26 | 36.79   | $\pm$ 0.90 | 0.84   | 42.85                      | $\pm$ 0.22 | 43.88   | $\pm$ 0.20 | 0.04   | 39.18                        | $\pm$ 0.92 | 39.05   | $\pm$ 1.41 | 0.90   |
| C18:2 $\omega$ -6 (LA)               | 0.18                | $\pm$ 0.03 | 0.34    | $\pm$ 0.01 | 0.00   | 0.72                  | $\pm$ 0.09 | 1.20    | $\pm$ 0.14 | 0.01   | 0.39                       | $\pm$ 0.30 | 0.33    | $\pm$ 0.08 | 0.81   | 0.97                         | $\pm$ 0.08 | 1.00    | $\pm$ 0.26 | 0.84   |
| C20:2 $\omega$ -6                    | 3.25                | $\pm$ 0.24 | 2.72    | $\pm$ 0.22 | 0.05   | 0.95                  | $\pm$ 0.14 | 0.82    | $\pm$ 0.15 | 0.32   | 3.91                       | $\pm$ 0.28 | 3.99    | $\pm$ 0.09 | 0.77   | 1.27                         | $\pm$ 0.21 | 1.27    | $\pm$ 0.27 | 0.99   |
| C20:3 $\omega$ -6 (DGLA)             | 0.74                | $\pm$ 0.10 | 0.94    | $\pm$ 0.09 | 0.06   | 1.67                  | $\pm$ 0.07 | 2.20    | $\pm$ 0.11 | 0.00   | 1.21                       | $\pm$ 0.37 | 1.02    | $\pm$ 0.07 | 0.55   | 2.00                         | $\pm$ 0.06 | 1.97    | $\pm$ 0.20 | 0.81   |
| C20:4 $\omega$ -6 (AA)               | 1.01                | $\pm$ 0.14 | 1.47    | $\pm$ 0.04 | 0.01   | 3.01                  | $\pm$ 0.36 | 3.43    | $\pm$ 0.09 | 0.11   | 1.14                       | $\pm$ 0.07 | 1.01    | $\pm$ 0.02 | 0.13   | 3.80                         | $\pm$ 0.12 | 3.96    | $\pm$ 0.18 | 0.33   |
| C22:4 $\omega$ -6 (ADA)              | 0.60                | $\pm$ 0.01 | 0.87    | $\pm$ 0.06 | 0.00   | 1.24                  | $\pm$ 0.13 | 1.40    | $\pm$ 0.03 | 0.10   | 0.56                       | $\pm$ 0.02 | 0.49    | $\pm$ 0.02 | 0.07   | 1.36                         | $\pm$ 0.05 | 1.42    | $\pm$ 0.14 | 0.51   |
| C22:5 $\omega$ -6 ( $\omega$ -6 DPA) | 0.10                | $\pm$ 0.03 | 0.10    | $\pm$ 0.01 | 0.84   | 0.22                  | $\pm$ 0.03 | 0.19    | $\pm$ 0.01 | 0.12   | 0.24                       | $\pm$ 0.04 | 0.34    | $\pm$ 0.23 | 0.62   | 0.45                         | $\pm$ 0.08 | 0.54    | $\pm$ 0.29 | 0.61   |
| Total $\omega$ -6                    | 5.88                | $\pm$ 0.29 | 6.45    | $\pm$ 0.29 | 0.07   | 7.82                  | $\pm$ 0.47 | 9.24    | $\pm$ 0.35 | 0.01   | 7.07                       | $\pm$ 0.10 | 7.04    | $\pm$ 0.21 | 0.88   | 9.86                         | $\pm$ 0.36 | 10.18   | $\pm$ 0.24 | 0.37   |
| C18:3 $\omega$ -3 (ALA)              | 1.79                | $\pm$ 0.09 | 1.68    | $\pm$ 0.04 | 0.12   | 0.95                  | $\pm$ 0.08 | 0.91    | $\pm$ 0.04 | 0.45   | 1.65                       | $\pm$ 0.27 | 2.01    | $\pm$ 0.11 | 0.10   | 1.15                         | $\pm$ 0.10 | 0.98    | $\pm$ 0.21 | 0.28   |
| C20:4 $\omega$ -3                    | 0.06                | $\pm$ 0.02 | 0.08    | $\pm$ 0.02 | 0.36   | 0.16                  | $\pm$ 0.01 | 0.19    | $\pm$ 0.02 | 0.13   | 0.16                       | $\pm$ 0.07 | 0.19    | $\pm$ 0.09 | 0.37   | 0.36                         | $\pm$ 0.07 | 0.38    | $\pm$ 0.09 | 0.72   |
| C20:5 $\omega$ -3 (EPA)              | 0.09                | $\pm$ 0.03 | 0.07    | $\pm$ 0.01 | 0.54   | 0.09                  | $\pm$ 0.02 | 0.09    | $\pm$ 0.01 | 0.73   | 0.20                       | $\pm$ 0.08 | 0.14    | $\pm$ 0.00 | 0.18   | 0.22                         | $\pm$ 0.02 | 0.26    | $\pm$ 0.14 | 0.61   |
| C22:5 $\omega$ -3 ( $\omega$ -3 DPA) | 0.47                | $\pm$ 0.04 | 0.52    | $\pm$ 0.06 | 0.23   | 0.96                  | $\pm$ 0.11 | 0.92    | $\pm$ 0.05 | 0.62   | 0.51                       | $\pm$ 0.01 | 0.34    | $\pm$ 0.02 | 0.01   | 1.04                         | $\pm$ 0.08 | 1.08    | $\pm$ 0.14 | 0.69   |
| C22:6 $\omega$ -3 (DHA)              | 0.09                | $\pm$ 0.01 | 0.10    | $\pm$ 0.02 | 0.40   | 1.04                  | $\pm$ 0.13 | 1.01    | $\pm$ 0.09 | 0.78   | 0.23                       | $\pm$ 0.07 | 0.33    | $\pm$ 0.18 | 0.72   | 1.78                         | $\pm$ 0.14 | 1.81    | $\pm$ 0.15 | 0.85   |
| Total $\omega$ -3                    | 2.49                | $\pm$ 0.05 | 2.45    | $\pm$ 0.06 | 0.45   | 3.20                  | $\pm$ 0.19 | 3.12    | $\pm$ 0.07 | 0.52   | 2.86                       | $\pm$ 0.01 | 2.85    | $\pm$ 0.10 | 0.95   | 4.55                         | $\pm$ 0.17 | 4.51    | $\pm$ 0.45 | 0.90   |
| Total PUFA                           | 8.36                | $\pm$ 0.34 | 8.90    | $\pm$ 0.35 | 0.13   | 11.02                 | $\pm$ 0.65 | 12.36   | $\pm$ 0.37 | 0.04   | 9.93                       | $\pm$ 0.09 | 9.84    | $\pm$ 0.25 | 0.68   | 14.41                        | $\pm$ 0.47 | 14.69   | $\pm$ 0.69 | 0.62   |
| C22:6 $\omega$ -3:C20:4 $\omega$ -6  | 0.14                | $\pm$ 0.02 | 0.07    | $\pm$ 0.01 | 0.01   | 0.84                  | $\pm$ 0.05 | 0.30    | $\pm$ 0.02 | 0.00   | 0.24                       | $\pm$ 0.04 | 0.23    | $\pm$ 0.09 | 0.84   | 0.47                         | $\pm$ 0.02 | 0.46    | $\pm$ 0.02 | 0.60   |
| $\omega$ -3 PUFA: $\omega$ -6 PUFA   | 0.42                | $\pm$ 0.01 | 0.38    | $\pm$ 0.01 | 0.01   | 0.41                  | $\pm$ 0.00 | 0.34    | $\pm$ 0.01 | 0.00   | 0.40                       | $\pm$ 0.01 | 0.40    | $\pm$ 0.01 | 0.41   | 0.46                         | $\pm$ 0.02 | 0.44    | $\pm$ 0.03 | 0.46   |

Data are presented as mean  $\pm$  standard deviation (SD).  $p$ -value of  $<0.05$  was considered statistically significant. N = 3.

**Table S4. Fatty acid composition of total phospholipids from A4-004N and A4-004Adh cells.**

| Fatty Acids        | A4-004N (N = 3)                                   |       | A4-004Adh (N = 3) |       |                   |
|--------------------|---------------------------------------------------|-------|-------------------|-------|-------------------|
|                    | % Abundance of fatty acids in total phospholipids |       |                   |       |                   |
|                    | Mean                                              | ±SD   | Mean              | ±SD   | <i>p</i> -value   |
| C14:0              | 1.92                                              | ±0.15 | 1.47              | ±0.10 | <i>p</i> = 0.011  |
| C15:0              | 0.21                                              | ±0.14 | 0.47              | ±0.04 | <i>p</i> = 0.038  |
| C16:0 (PA)         | 24.59                                             | ±0.04 | 26.23             | ±0.88 | <i>p</i> = 0.09   |
| C17:0              | 0.72                                              | ±0.11 | 0.58              | ±0.06 | <i>p</i> = 0.12   |
| C18:0 (SA)         | 14.86                                             | ±0.58 | 16.40             | ±0.55 | <i>p</i> = 0.057  |
| C20:0              | 0.50                                              | ±0.05 | 0.43              | ±0.11 | <i>p</i> = 0.38   |
| C24:0              | 4.43                                              | ±0.15 | 0.82              | ±0.22 | <i>p</i> = 0.0003 |
| Total SFA          | 47.23                                             | ±0.13 | 47.20             | ±0.10 | <i>p</i> = 0.84   |
| C16:1ω-9           | 8.22                                              | ±0.15 | 7.46              | ±0.39 | <i>p</i> = 0.08   |
| C18:1ω-9 (OA)      | 27.29                                             | ±0.22 | 23.66             | ±0.41 | <i>p</i> = 0.0015 |
| C18:1ω-7           | 6.18                                              | ±0.10 | 6.96              | ±0.19 | <i>p</i> = 0.0035 |
| C24:1ω-9           | 1.35                                              | ±0.29 | 1.11              | ±0.33 | <i>p</i> = 0.40   |
| Total MUFA         | 42.85                                             | ±0.22 | 39.18             | ±0.92 | <i>p</i> = 0.013  |
| C18:2ω-6 (LA)      | 0.39                                              | ±0.30 | 0.97              | ±0.08 | <i>p</i> = 0.032  |
| C20:2ω-6           | 3.91                                              | ±0.28 | 1.27              | ±0.21 | <i>p</i> = 0.0012 |
| C20:3ω-6 (DGLA)    | 1.21                                              | ±0.37 | 2.00              | ±0.06 | <i>p</i> = 0.021  |
| C20:4ω-6 (AA)      | 1.14                                              | ±0.07 | 3.80              | ±0.12 | <i>p</i> = 0.0001 |
| C22:4ω-6 (ADA)     | 0.56                                              | ±0.02 | 1.36              | ±0.05 | <i>p</i> = 0.0002 |
| C22:5ω-6 (ω-6 DPA) | 0.24                                              | ±0.04 | 0.45              | ±0.08 | <i>p</i> = 0.049  |
| Total ω-6          | 7.07                                              | ±0.10 | 9.86              | ±0.36 | <i>p</i> = 0.002  |
| C18:3ω-3 (ALA)     | 1.65                                              | ±0.27 | 1.15              | ±0.10 | <i>p</i> = 0.041  |
| C20:4ω-3           | 0.16                                              | ±0.07 | 0.36              | ±0.07 | <i>p</i> = 0.020  |
| C20:5ω-3 (EPA)     | 0.20                                              | ±0.08 | 0.22              | ±0.02 | <i>p</i> = 0.028  |
| C22:5ω-3 (ω-3 DPA) | 0.51                                              | ±0.01 | 1.04              | ±0.08 | <i>p</i> = 0.003  |
| C22:6ω-3 (DHA)     | 0.23                                              | ±0.07 | 1.78              | ±0.14 | <i>p</i> = 0.0008 |
| Total ω-3          | 2.86                                              | ±0.01 | 4.55              | ±0.17 | <i>p</i> = 0.0009 |
| Total PUFA         | 9.93                                              | ±0.09 | 14.41             | ±0.47 | <i>p</i> = 0.0010 |
| C22:6ω-3:C20:4ω-6  | 0.24                                              | ±0.04 | 0.47              | ±0.02 | <i>p</i> = 0.0035 |
| ω-3 PUFA:ω-6 PUFA  | 0.40                                              | ±0.01 | 0.46              | ±0.02 | <i>p</i> = 0.025  |

Data are presented as mean ± standard deviation (SD). *p*-value of <0.05 was considered statistically significant.

**Table S5. Fatty acid composition of total phospholipids from A4-004N and A4-004Adh cells cultured in media supplemented with BSA (control), 30  $\mu$ M AA or 30  $\mu$ M DHA.**

| Fatty Acids        | A4-004N                                           |       |                  |       |                   |        |                   | A4-004Adh           |       |                  |       |                   |       |                   |
|--------------------|---------------------------------------------------|-------|------------------|-------|-------------------|--------|-------------------|---------------------|-------|------------------|-------|-------------------|-------|-------------------|
|                    | BSA Control (N = 3)                               |       | AA 30 μM (N = 3) |       | DHA 30 μM (N = 3) |        |                   | BSA Control (N = 3) |       | AA 30 μM (N = 3) |       | DHA 30 μM (N = 3) |       |                   |
|                    | % Abundance of fatty acids in total phospholipids |       |                  |       |                   |        |                   |                     |       |                  |       |                   |       |                   |
|                    | Average                                           | ±SD   | Average          | ±SD   | Average           | ±SD    | ANOVA             | Average             | ±SD   | Average          | ±SD   | Average           | ±SD   | ANOVA             |
| C14:0              | 1.56                                              | ±0.56 | 2.08             | ±0.54 | 1.89              | ±0.36  | <i>p</i> = 0.47   | 1.48                | ±0.17 | 1.68             | ±0.20 | 1.63              | ±0.16 | <i>p</i> = 0.49   |
| C15:0              | 0.20                                              | ±0.09 | 0.18             | ±0.09 | 0.22              | ±0.10  | <i>p</i> = 0.85   | 0.46                | ±0.07 | 0.46             | ±0.06 | 0.49              | ±0.05 | <i>p</i> = 0.85   |
| C16:0 (PA)         | 24.50                                             | ±0.54 | 24.06            | ±0.15 | 25.01             | ±0.23  | <i>p</i> = 0.15   | 26.18a              | ±0.97 | 29.56b           | ±0.20 | 28.20ab           | ±0.85 | <i>p</i> = 0.030  |
| C17:0              | 0.70                                              | ±0.19 | 0.58             | ±0.17 | 0.49              | ±0.13  | <i>p</i> = 0.33   | 0.57                | ±0.08 | 0.66             | ±0.07 | 0.73              | ±0.07 | <i>p</i> = 0.17   |
| C18:0 (SA)         | 14.53                                             | ±0.54 | 18.29            | ±2.10 | 19.20             | ±1.55  | <i>p</i> = 0.064  | 16.24a              | ±0.85 | 17.26ab          | ±0.36 | 18.44b            | ±0.49 | <i>p</i> = 0.017  |
| C20:0              | 0.56                                              | ±0.14 | 0.35             | ±0.04 | 0.48              | ±0.01  | <i>p</i> = 0.20   | 0.55                | ±0.11 | 0.42             | ±0.02 | 0.37              | ±0.00 | <i>p</i> = 0.061  |
| C24:0              | 3.92                                              | ±0.57 | 2.78             | ±0.19 | 2.52              | ±0.30  | <i>p</i> = 0.070  | 0.78a               | ±0.15 | 0.42b            | ±0.04 | 0.45b             | ±0.02 | <i>p</i> = 0.017  |
| Total SFA          | 46.17a                                            | ±0.21 | 47.41b           | ±0.10 | 49.14c            | ±0.31  | <i>p</i> = 0.0021 | 46.27               | ±2.10 | 50.81            | ±0.15 | 50.04             | ±1.36 | <i>p</i> = 0.062  |
| C16:1ω-9           | 8.00a                                             | ±0.06 | 5.41b            | ±0.89 | 5.56b             | ±0.71  | <i>p</i> = 0.022  | 7.33                | ±0.38 | 4.22             | ±0.26 | 4.53              | ±0.40 | <i>p</i> = 0.0004 |
| C18:1ω-9 (OA)      | 28.14a                                            | ±0.36 | 21.62b           | ±1.57 | 23.72ab           | ±1.39  | <i>p</i> = 0.028  | 23.56a              | ±0.46 | 15.99b           | ±0.80 | 18.84c            | ±0.63 | <i>p</i> = 0.0002 |
| C18:1ω-7           | 6.26a                                             | ±0.20 | 4.95b            | ±0.08 | 4.61c             | ±0.04  | <i>p</i> < 0.0001 | 6.93a               | ±0.40 | 5.33b            | ±0.19 | 5.21b             | ±0.14 | <i>p</i> = 0.0010 |
| C24:1ω-9           | 1.40                                              | ±0.04 | 1.18             | ±0.32 | 1.01              | ±0.30  | <i>p</i> = 0.24   | 1.23                | ±0.17 | 1.22             | ±0.28 | 1.08              | ±0.15 | <i>p</i> = 0.69   |
| Total MUFA         | 43.88a                                            | ±0.20 | 33.46b           | ±2.04 | 35.32b            | ±2.02  | <i>p</i> = 0.016  | 39.05a              | ±1.41 | 26.76b           | ±1.03 | 29.67b            | ±1.29 | <i>p</i> = 0.0003 |
| C18:2ω-6 (LA)      | 0.33a                                             | ±0.08 | 0.24a            | ±0.02 | 1.08b             | ±0.02  | <i>p</i> = 0.0007 | 1.00a               | ±0.26 | 0.91a            | ±0.10 | 2.17b             | ±0.27 | <i>p</i> = 0.0016 |
| C20:2ω-6           | 3.99a                                             | ±0.09 | 2.39b            | ±0.03 | 2.44b             | ±0.02  | <i>p</i> = 0.0001 | 1.27a               | ±0.27 | 0.42b            | ±0.14 | 0.42b             | ±0.07 | <i>p</i> = 0.0028 |
| C20:3ω-6 (DGLA)    | 1.02                                              | ±0.07 | 1.34             | ±0.13 | 1.31              | ±0.06  | <i>p</i> = 0.059  | 1.97ab              | ±0.20 | 1.77a            | ±0.11 | 2.13b             | ±0.04 | <i>p</i> = 0.035  |
| C20:4ω-6 (AA)      | 1.01a                                             | ±0.02 | 6.44b            | ±0.44 | 1.70a             | ±0.87  | <i>p</i> = 0.0020 | 3.96a               | ±0.18 | 8.65b            | ±0.28 | 3.76a             | ±0.35 | <i>p</i> < 0.0001 |
| C22:4ω-6 (ADA)     | 0.49a                                             | ±0.02 | 6.64b            | ±0.92 | 0.77a             | ±0.31  | <i>p</i> = 0.0001 | 1.42a               | ±0.14 | 6.71b            | ±0.22 | 1.22a             | ±0.18 | <i>p</i> < 0.0001 |
| C22:5ω-6 (ω-6 DPA) | 0.34a                                             | ±0.23 | 1.03b            | ±0.28 | 0.45a             | ±0.14  | <i>p</i> = 0.019  | 0.54a               | ±0.29 | 1.32b            | ±0.07 | 0.47a             | ±0.15 | <i>p</i> = 0.0032 |
| Total ω-6          | 7.04a                                             | ±0.21 | 17.26b           | ±1.32 | 7.02a             | ±0.50  | <i>p</i> = 0.0017 | 10.18a              | ±0.24 | 19.77b           | ±0.62 | 10.17a            | ±0.45 | <i>p</i> < 0.0001 |
| C18:3ω-3 (ALA)     | 2.01a                                             | ±0.11 | 1.23b            | ±0.17 | 1.13b             | ±0.10  | <i>p</i> = 0.0003 | 0.98                | ±0.21 | 0.89             | ±0.03 | 0.93              | ±0.17 | <i>p</i> = 0.81   |
| C20:4ω-3           | 0.19                                              | ±0.09 | 0.13             | ±0.01 | 0.10              | ±0.003 | <i>p</i> = 0.29   | 0.38a               | ±0.09 | 0.18b            | ±0.03 | 0.20ab            | ±0.08 | <i>p</i> = 0.045  |
| C20:5ω-3 (EPA)     | 0.14a                                             | ±0.00 | 0.11a            | ±0.06 | 0.41b             | ±0.06  | <i>p</i> = 0.0026 | 0.26a               | ±0.14 | 0.16a            | ±0.06 | 0.62b             | ±0.09 | <i>p</i> = 0.0044 |
| C22:5ω-3 (ω-3 DPA) | 0.34a                                             | ±0.02 | 0.84b            | ±0.05 | 0.90b             | ±0.11  | <i>p</i> = 0.0036 | 1.08                | ±0.14 | 0.97             | ±0.10 | 1.22              | ±0.11 | <i>p</i> = 0.095  |
| C22:6ω-3 (DHA)     | 0.33a                                             | ±0.18 | 0.27a            | ±0.07 | 6.01b             | ±0.68  | <i>p</i> < 0.0001 | 1.81a               | ±0.15 | 1.52a            | ±0.29 | 6.88b             | ±0.73 | <i>p</i> < 0.0001 |
| Total ω-3          | 2.85a                                             | ±0.10 | 2.53a            | ±0.13 | 8.53b             | ±0.86  | <i>p</i> < 0.0001 | 4.51a               | ±0.45 | 3.71a            | ±0.42 | 9.85b             | ±0.64 | <i>p</i> < 0.0001 |
| Total PUFA         | 9.84a                                             | ±0.25 | 19.80b           | ±1.19 | 15.54b            | ±1.71  | <i>p</i> = 0.0086 | 14.69a              | ±0.69 | 23.48b           | ±1.01 | 20.02c            | ±1.08 | <i>p</i> = 0.0006 |
| C22:6ω-3:C20:4ω-6  | 0.23a                                             | ±0.09 | 0.04a            | ±0.01 | 4.92b             | ±0.06  | <i>p</i> < 0.0001 | 0.46a               | ±0.02 | 0.16b            | ±0.00 | 1.76c             | ±0.03 | <i>p</i> < 0.0001 |
| ω-3 PUFA:ω-6 PUFA  | 0.40a                                             | ±0.01 | 0.15b            | ±0.02 | 1.21c             | ±0.09  | <i>p</i> = 0.0005 | 0.44a               | ±0.03 | 0.18b            | ±0.00 | 0.97c             | ±0.02 | <i>p</i> < 0.0001 |

Different letters indicate that groups are significantly different. Differences were assessed for significance using one-way analysis of variance followed by post-hoc Tukey's test.  $p$ -value of  $<0.05$  was considered statistically significant.
